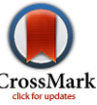

## Correction

# Correction: Three-Dimensional Mid-Air Acoustic Manipulation by Ultrasonic Phased Arrays

**The PLOS ONE Staff**

Attribution for the music used in Video S1 is missing. The music is republished under a CC BY license from the Classical Music Sound Library, <http://classical-sound.seesaa.net/>, created by Ando Towa.

**Reference**

1. Ochiai Y, Hoshi T, Rekimoto J (2014) Three-Dimensional Mid-Air Acoustic Manipulation by Ultrasonic Phased Arrays. PLoS ONE 9(5): e97590. doi:10.1371/journal.pone.0097590.

---

**Citation:** The PLOS ONE Staff (2014) Correction: Three-Dimensional Mid-Air Acoustic Manipulation by Ultrasonic Phased Arrays. PLoS ONE 9(7): e102525. doi:10.1371/journal.pone.0102525

**Published:** July 9, 2014

**Copyright:** © 2014 The PLOS ONE Staff. This is an open-access article distributed under the terms of the Creative Commons Attribution License, which permits unrestricted use, distribution, and reproduction in any medium, provided the original author and source are credited.
